# Supplementary material
Source: Springer Nature journal article supplement (https://www.springermedizin.de/resource/supplementary/12958_2009_642_MOESM1_ESM.pdf/9568486)

1 2 3 4 5 6 7 8 9 10 11

**Leptin-R**

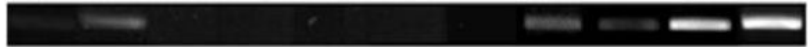

**HspA2**

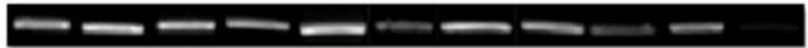

**$\beta$ -Actin**

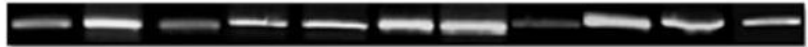

Supplement: MOESM1 [file 9568486]
